# Supplementary material for: The most common RNF43 mutant G659Vfs*41 is fully functional in inhibiting Wnt signaling and unlikely to play a role in tumorigenesis
Source: PubMed Central journal article supplement (PMC6898356; doi:10.1038/s41598-019-54931-3), 2019-12-06
Supplement: 41598_2019_54931_MOESM1_ESM.pdf [file 41598_2019_54931_MOESM1_ESM.pdf]

The most common RNF43 mutant G659Vfs\*41 is fully functional in inhibiting Wnt signaling and unlikely to play a role in tumorigenesis

Jianghua Tu<sup>1</sup>, Soohyun Park<sup>1</sup>, Wangsheng Yu<sup>1</sup>, Sheng Zhang<sup>1</sup>, Ling Wu<sup>1</sup>, Kendra Carmon<sup>1</sup> and Qingyun J. Liu<sup>1\*</sup>

# Supplementary Tables and Figures

Supplementary Table S1. Expression and mutation profile of 4 colon cancer cell lines

| Cell line | Expression |       |       | Mutation         |                                   |             |      |        |
|-----------|------------|-------|-------|------------------|-----------------------------------|-------------|------|--------|
|           | AXIN2      | RNF43 | ZNRF3 | RNF43            | APC                               | BRAF        | KRAS | CTNNB1 |
| HT29      | 6.3        | 9.9   | 10.3  | None             | T1556Nfs*3,<br>E853*              | V600E,T119S | None | None   |
| RKO       | 4.7        | 5.0   | 6.6   | X659fs-hom       | None                              | V600E       | None | None   |
| DLD1      | 8.6        | 9.6   | 9.8   | X659fs,<br>L214M | S1426x                            | None        | None | None   |
| LOVO      | 7.3        | 7.6   | 8.5   | None             | R1114*,<br>R2816Q,<br>M1431Cfs*42 | None        | G13D | None   |

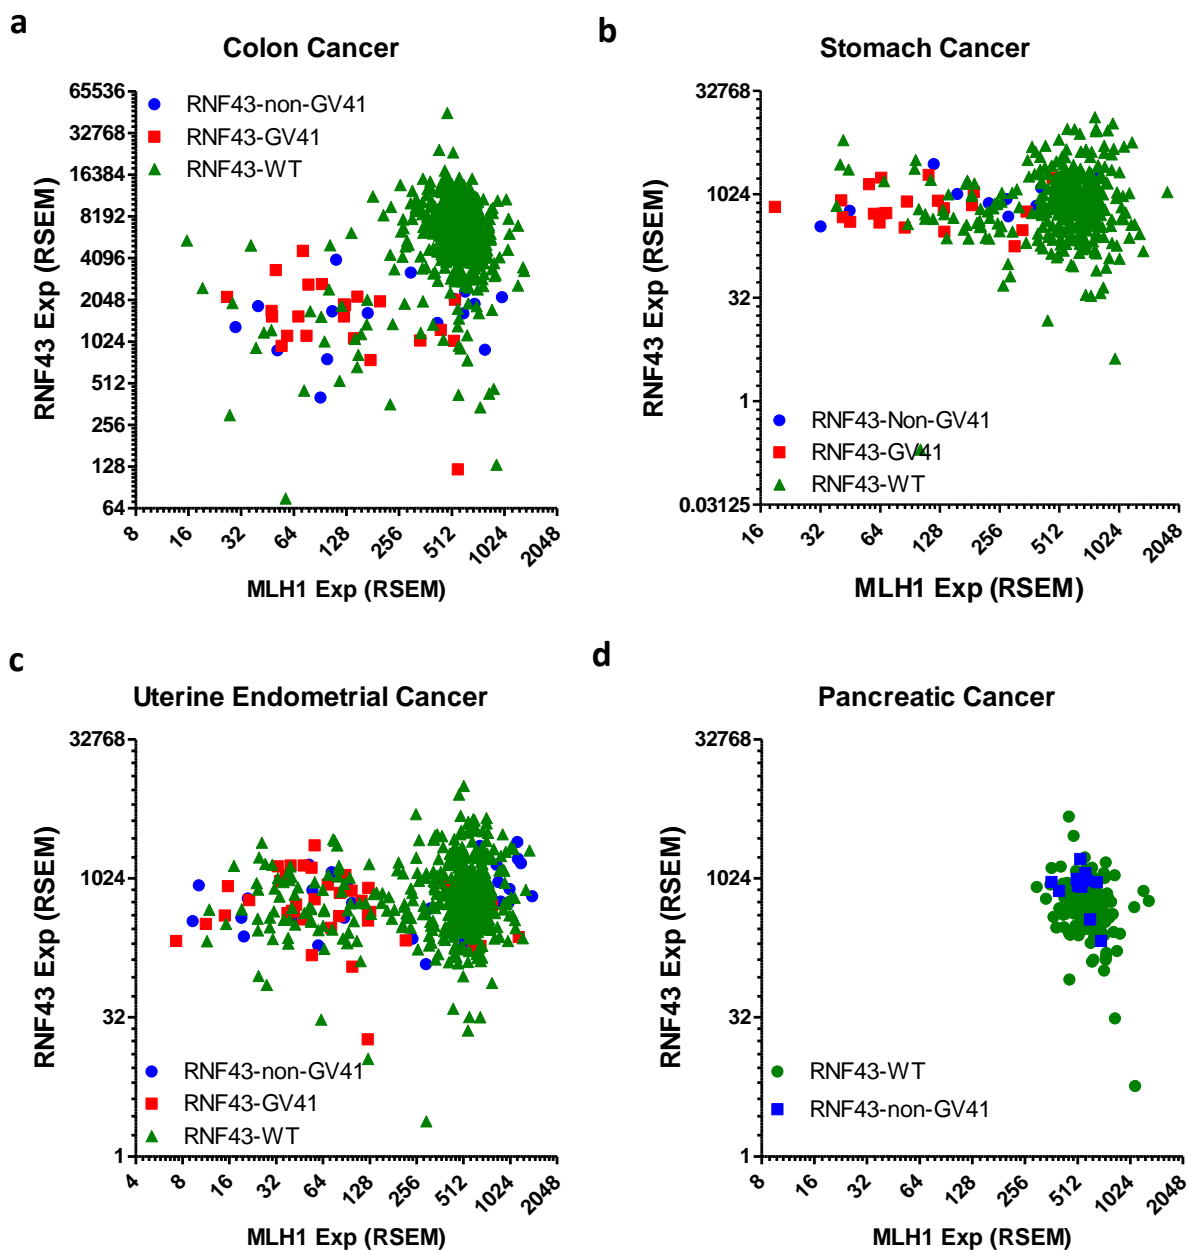

Supplementary Figure S1. RNF43-G659Vfs\*41 mutations in colon, stomach, and endometrial cancers occurred nearly exclusively in tumors with low MLH1 expression. a-d, RNA-seq expression data and mutation status of RNF43 were plotted against RNA-seq data of MLH1 in colon (a), stomach (b), uterine endometrial (c), and pancreatic cancer (d). GV41 = G659Vfs\*41.

**a**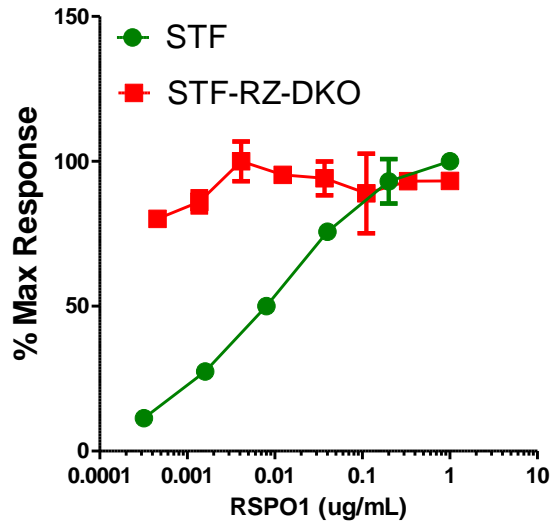**b**

| Sequences of ZNRF3 Exon 2 and RNF43 Exon 2 in the STF clone D8 that had knockout of both RNF43 and ZNRF3. |                                                                      | # nucleotides changed |
|-----------------------------------------------------------------------------------------------------------|----------------------------------------------------------------------|-----------------------|
| ZNRF3                                                                                                     | 5' - CGAAGAGGACTTGTATGAATATGGCTGGGTAGGAGTGGTGAAGCT -3'               |                       |
| D8-1                                                                                                      | 5' - CGAAGAGGACTTGTATGAATAT <del>T</del> GGCTGGGTAGGAGTGGTGAAGCT -3' | +1                    |
| D8-2                                                                                                      | 5' - CGAAGAGGACTTG-----GGCTGGGTAGGAGTGGTGAAGCT -3'                   | -9                    |
| RNF43                                                                                                     | 5' - TGCCTGCAGGGTAGCCATCAGCAGCCAGGGCCAGAGGGCAGCCAGCTG -3'            |                       |
| D8-1                                                                                                      | 5' - TGCCTGCA-GGTAGCCATCAGCAGCCAGGGCCAGAGGGCAGCCAGCTG -3'            | -1                    |
| D8-2                                                                                                      | 5' - TGCC-----AGAGGGCAGCCAGCTG -3'                                   | -28                   |

Supplementary Figure S2. Characterization of STF cells with double knockout of RNF43 and ZNRF3 (STF-RZ-DKO). **(a)** TOPFlash Wnt signaling assay results of parental STF and STF-RZ-DKO cells in response to RSP01. **(b)** Sequence alignment of exon2 of RNF43 and ZNRF3 in STF cells with double knockout of the two genes. For both genes, the sequences of each allele are aligned with that of the WT sequence with the deleted sequences shown as gaps.

**a**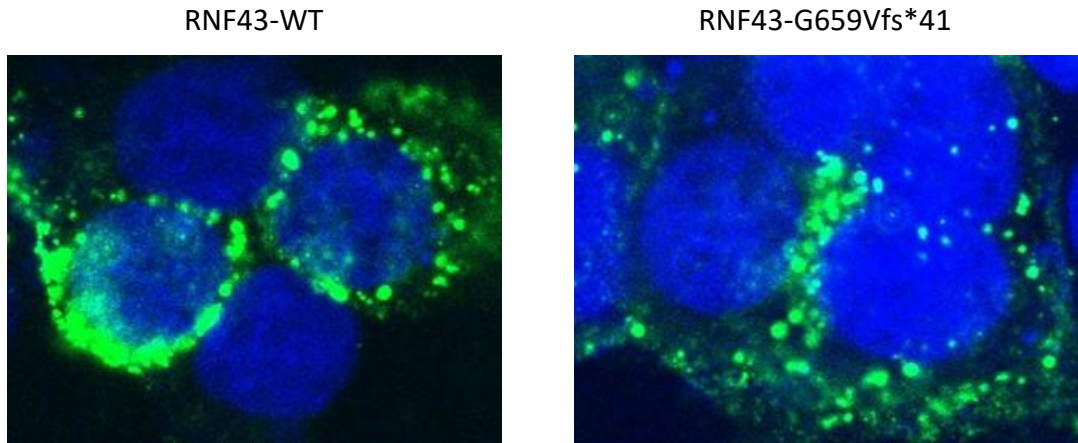**b**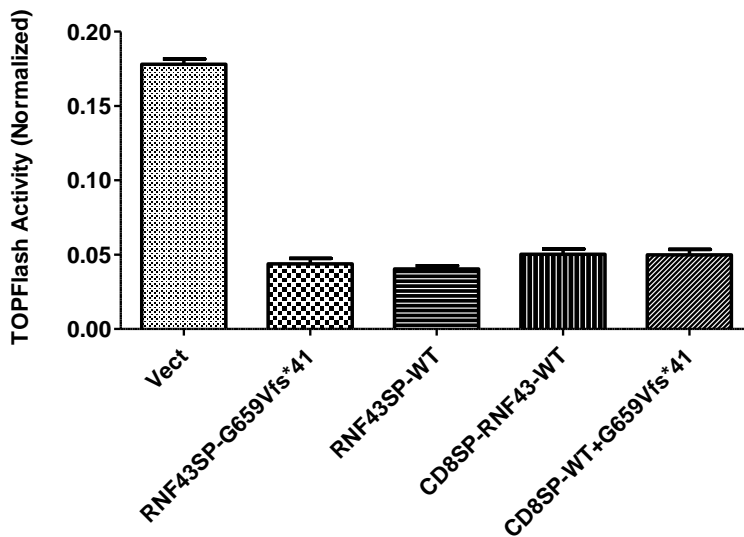

Supplementary Figure S3. RNF43-WT and –G659Vfs\*41 with native signal peptide were nearly identical in binding and internalizing RSPO, as well as inhibiting Wnt signaling. **(a)** Confocal immunofluorescence microscopy of STF-RZ-DKO cells transfected with RNF43-WT or G659Vfs41 constructs that contain native signal peptide sequences. The cells were incubated with RSPO2-Fu-F109A-IgG1-Fc at 37 °C for one hour and then washed, fixed, permeabilized, followed by staining with Alexa488-labeled anti-human IgG (green). Nuclei were stained with TO-PRO-3 (blue). **(b)** TOPFlash results of STF-RZ-DKO cells transfected with the indicated plasmids following Wnt ligand stimulation. RNF43SP-G659Vfs\*41 and –WT are mutant and wild-type RNF43 with its native signal peptide sequence, respectively. CD8SP-RNF43-WT is wild-type RNF43 with CD8 signal peptide and HA tag. The last column represents results of cells transfected with equal amounts of CD8SP-WT and CD8SP-G659Vfs\*41 plasmids.

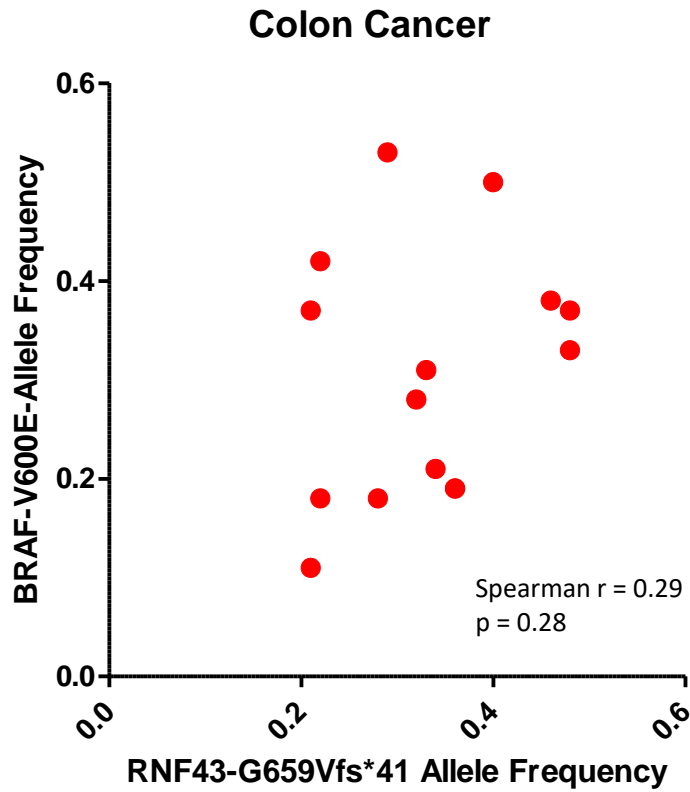

Supplementary Figure S4. No correlation between allele frequency of RNF43-G659Vfs\*41 and BRAF-V600E in TCGA's colon cancer cohort. Of the 15 tumors with both RNF43-G659Vfs\*41 and BRAF-V600E mutations, the respective allele frequencies were plotted as labeled.

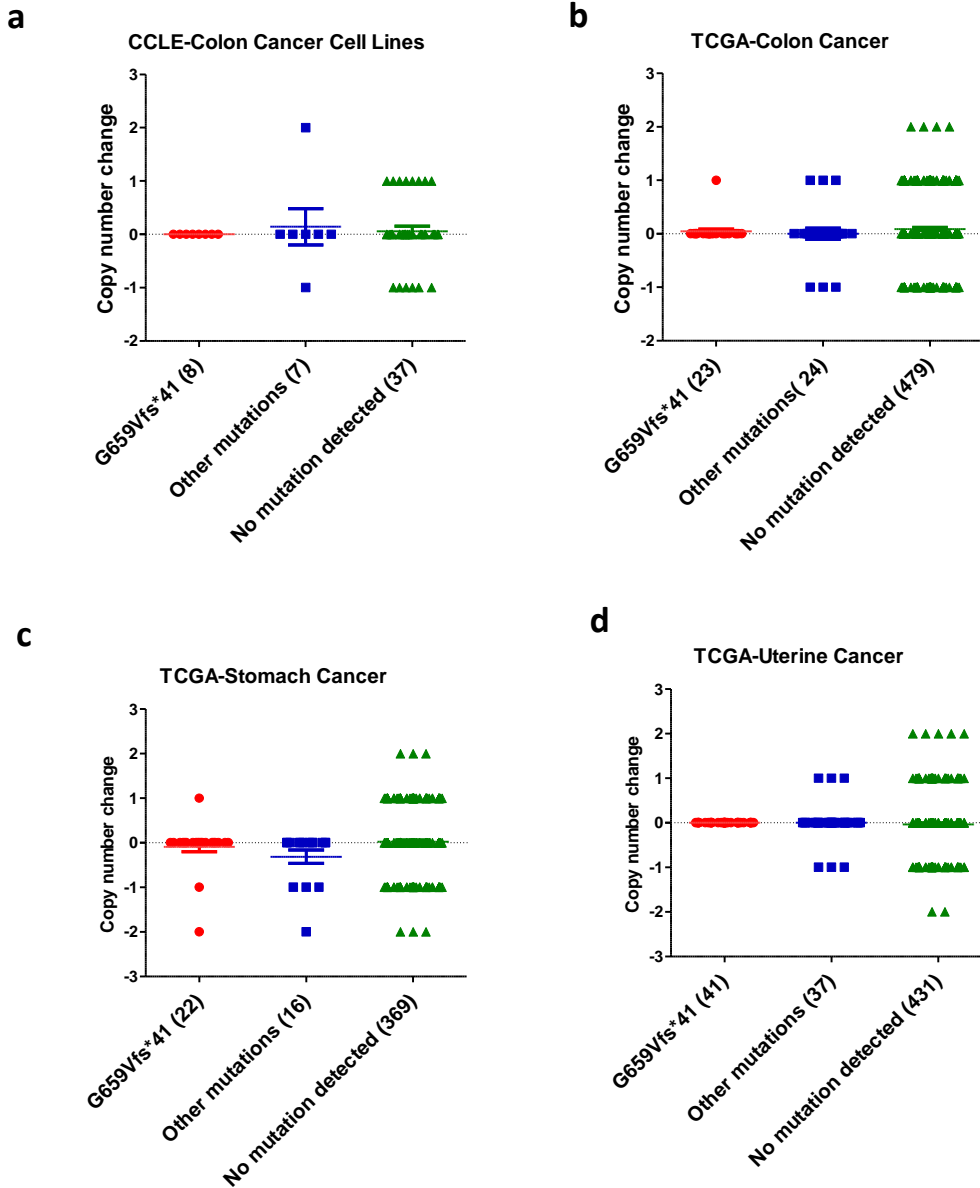

Supplementary Figure S5. No genomic copy number loss of RNF43 was detected in RNF43-mutated colon cancer cell lines and primary tumors. **(a)**, Copy number change of RNF43 vs its mutation status in 52 colon cancer cell lines analyzed at CCLE. **(b-d)**, Copy number change of RNF43 vs its mutation status in colon **(b)**, stomach **(c)**, and uterine cancer **(d)** in TCGA samples. The numbers in the parenthesis refer to the number of cell lines/cases for each genotype. Other mutations denote RNF43 mutations that are not G659Vfs\*41.

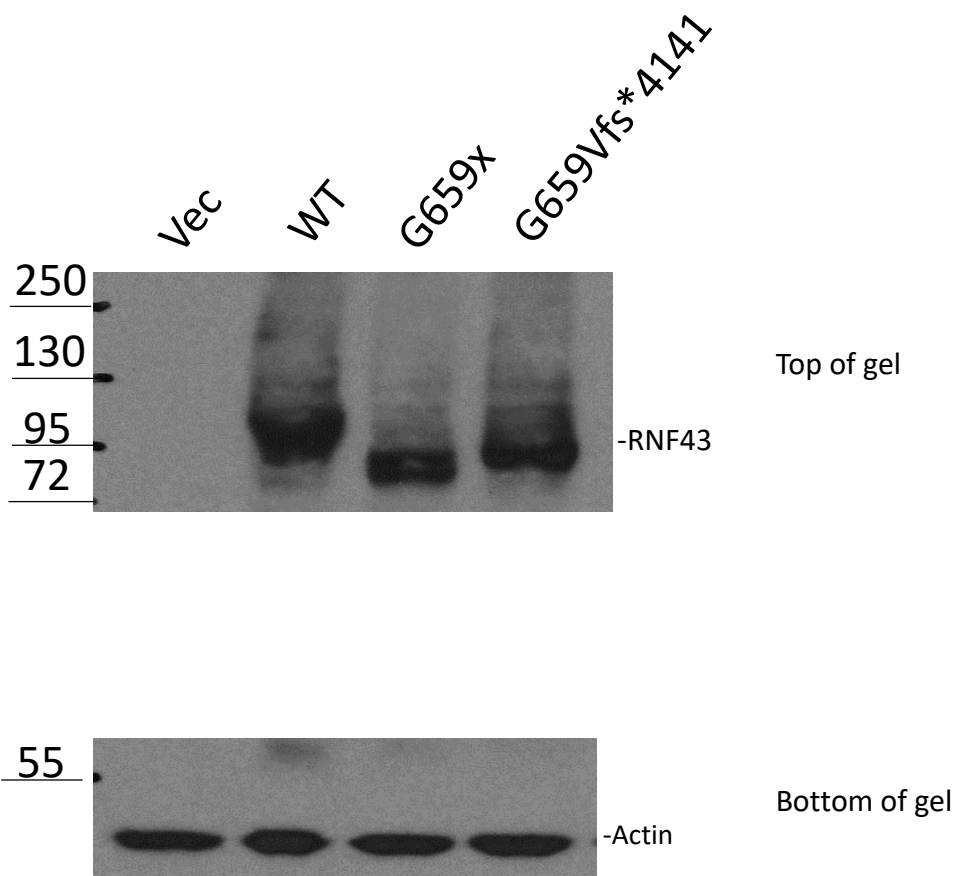

Figure 2b



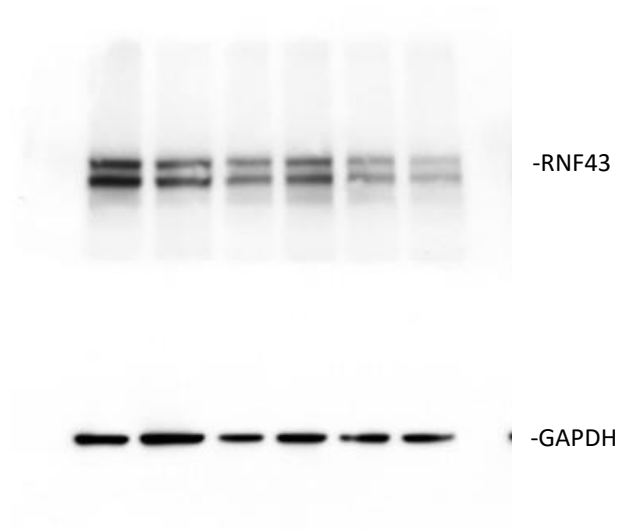

Figure 2d

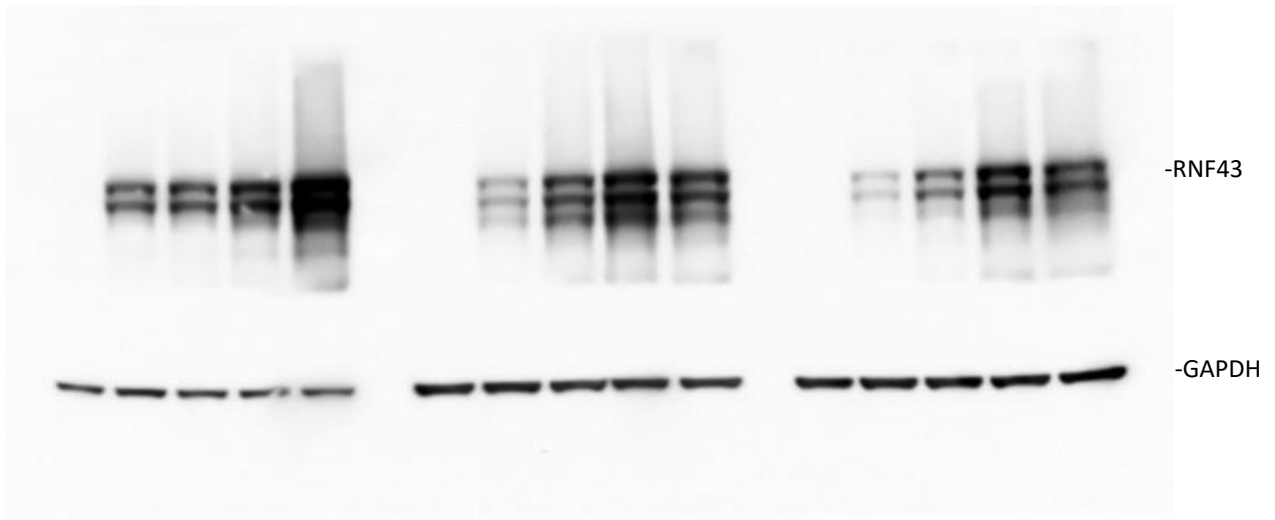

Figure 2f

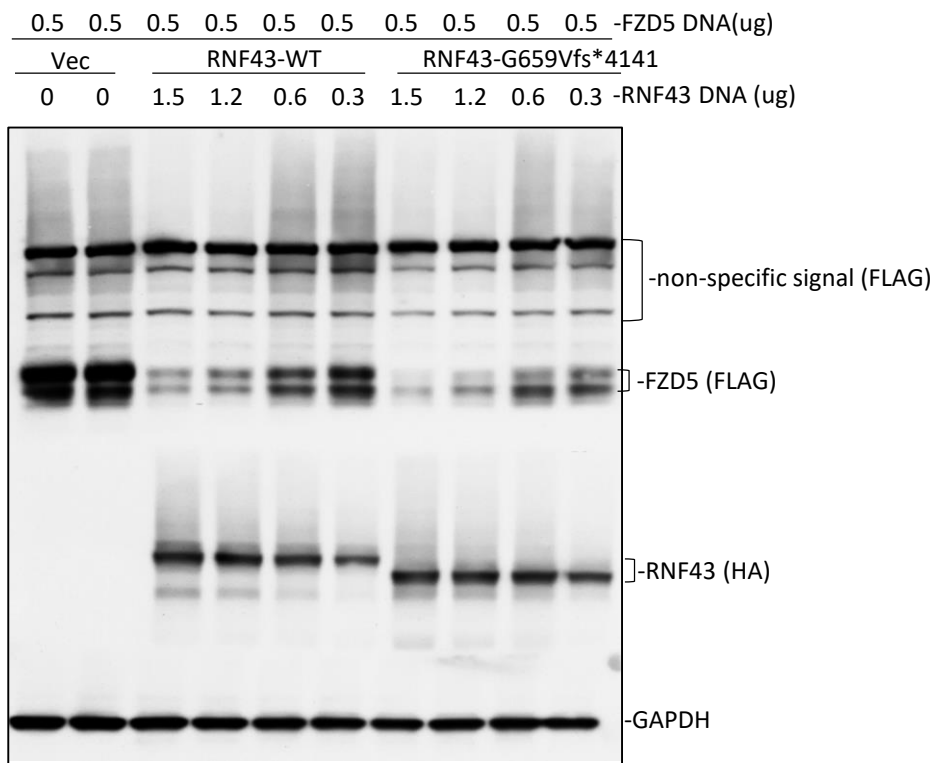

Figure 3c

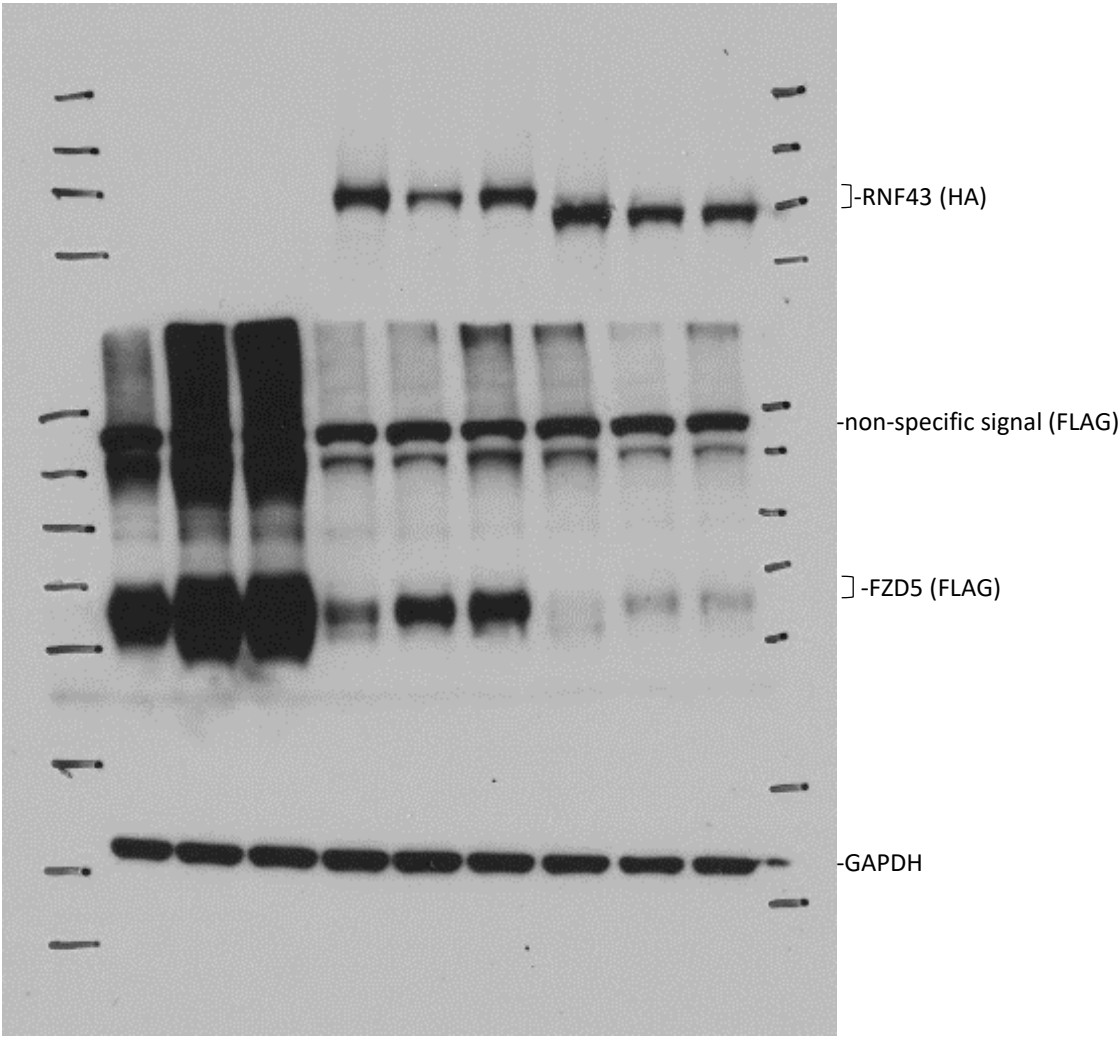

Figure 3d

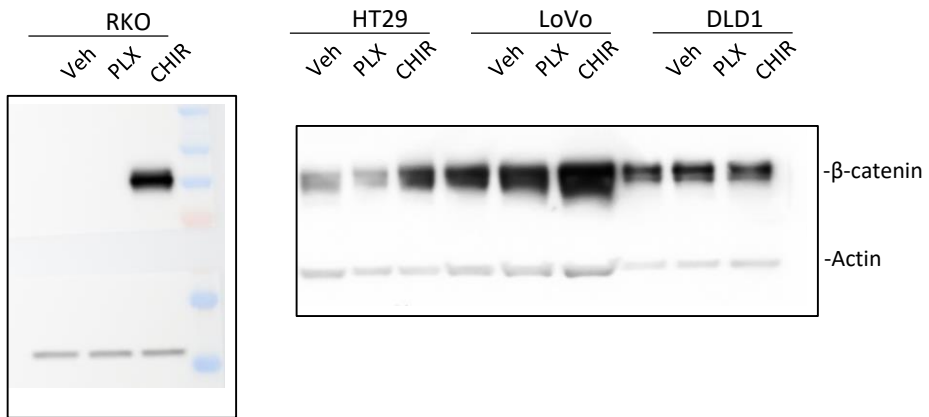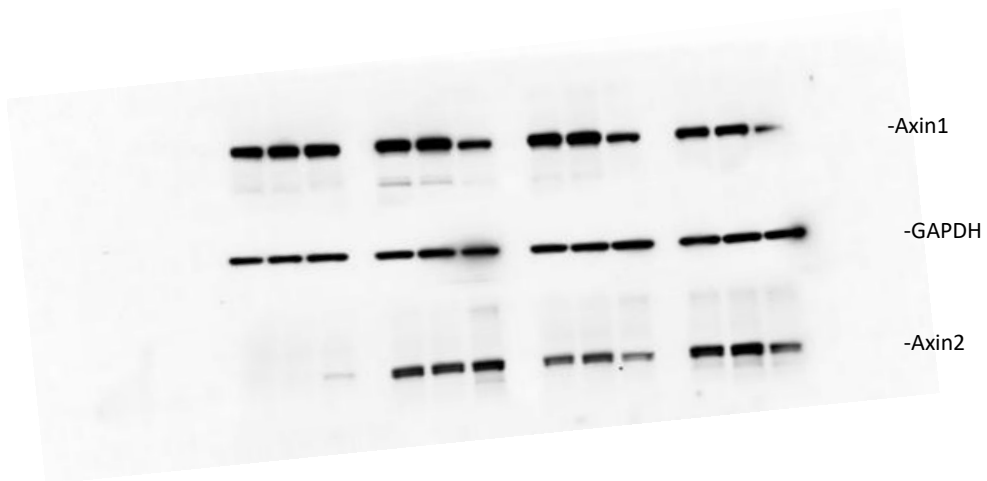

Figure 6a

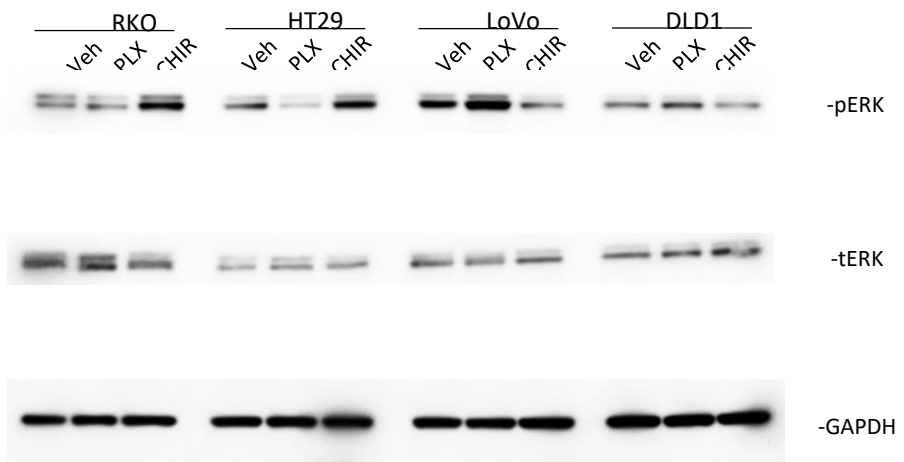

Figure 6b

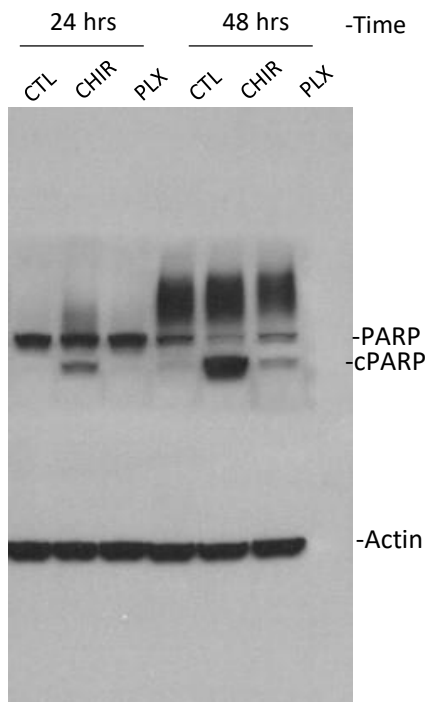

Figure 6c
